# Supplementary material for: Effect of morphology and temperature treatment control on the photocatalytic and photoluminescence properties of SrWO4 crystals
Source: Royal Society of Chemistry journal article supplement (doi:10.1039/c9pp00331b), 2020-01-08
Supplement: c9pp00331b1.pdf [file c9pp00331b1.pdf]

## Morphology and temperature treatment control on photocatalytic and photoluminescence properties of SrWO<sub>4</sub> crystal

Nadine DIRANY<sup>1,2</sup>, Abdelali HALLAOUI<sup>1</sup>, Jean Christophe VALMALETTE<sup>1</sup> and Madjid ARAB<sup>1,\*</sup>

<sup>1</sup> Université de Toulon, Aix Marseille Univ, CNRS, IM2NP, CS 60584, Toulon Cedex 9, F-83041, France

<sup>2</sup> Université Libanaise – Laboratoire MCEMA, Beyrouth - Liban

\* Corresponding Author's: [madjid.arab@univ-tln.fr](mailto:madjid.arab@univ-tln.fr)

### Supporting information

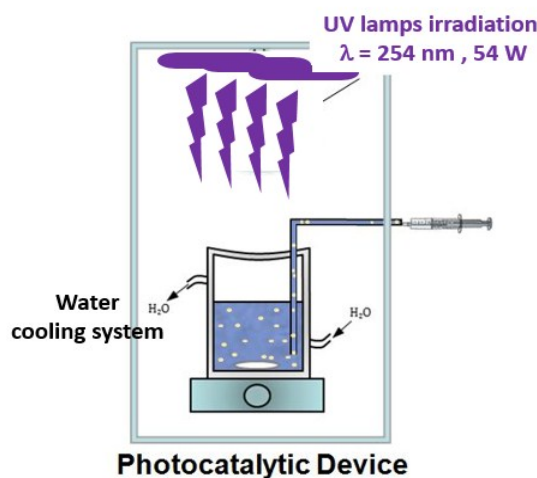

Figure S1: Photocatalyst device under UV irradiation at 254 nm and 54 W

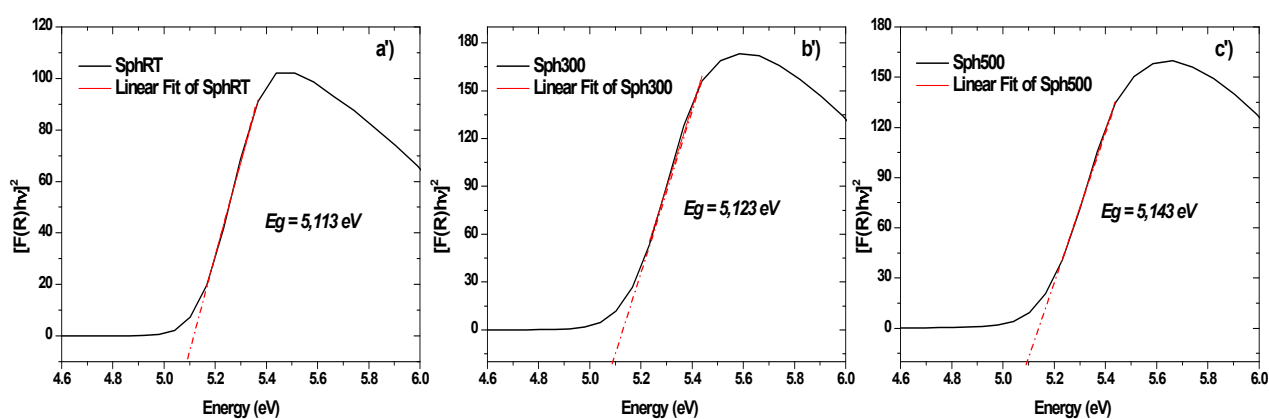

Figure S2: Kubelka – Munk functions derived from the UV-Vis reflectance spectra of the SrWO<sub>4</sub> sphere structures: a') SphRT, b') Sph300°C and c') Spi500°C.

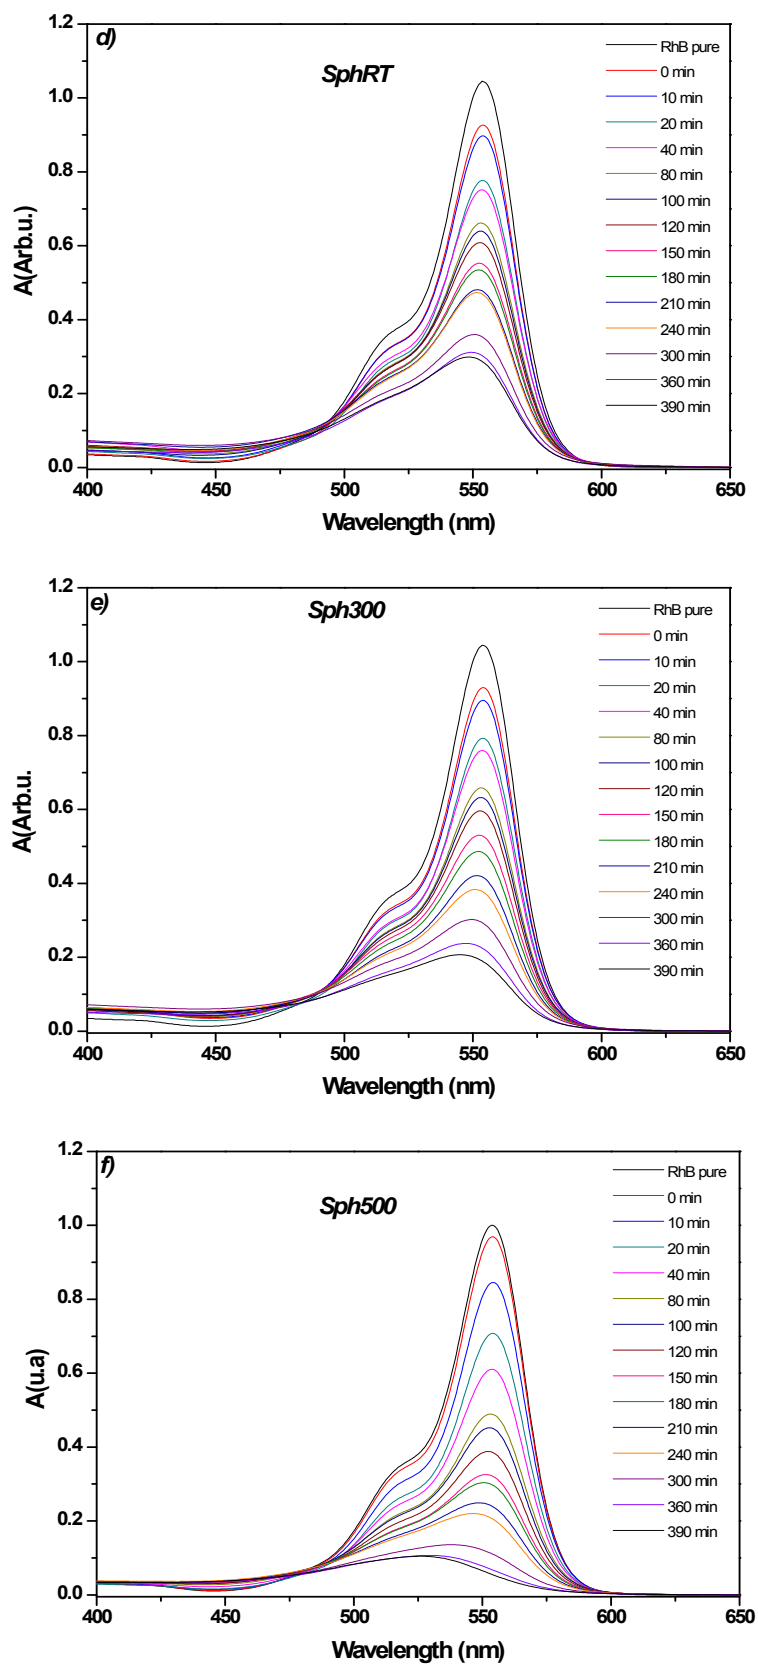

**Figure S3:** UV-Vis spectrum of the RhB solution decomposed under UV irradiation in the presence of SrWO<sub>4</sub> spheres: a') SphRT; b') Sph300 °C and c') Sph500 °C.

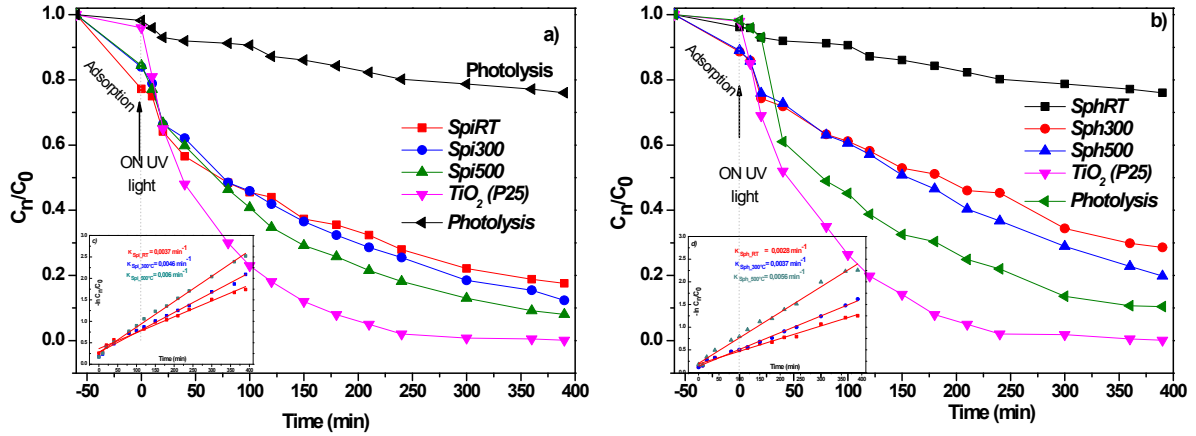

**Figure S4:** Photodegradation rate of SrWO<sub>4</sub> (a) spindles and (b) spheres treated at different temperatures. Inset figures c, d) correspond to the rate constants of the photocatalytic reaction.

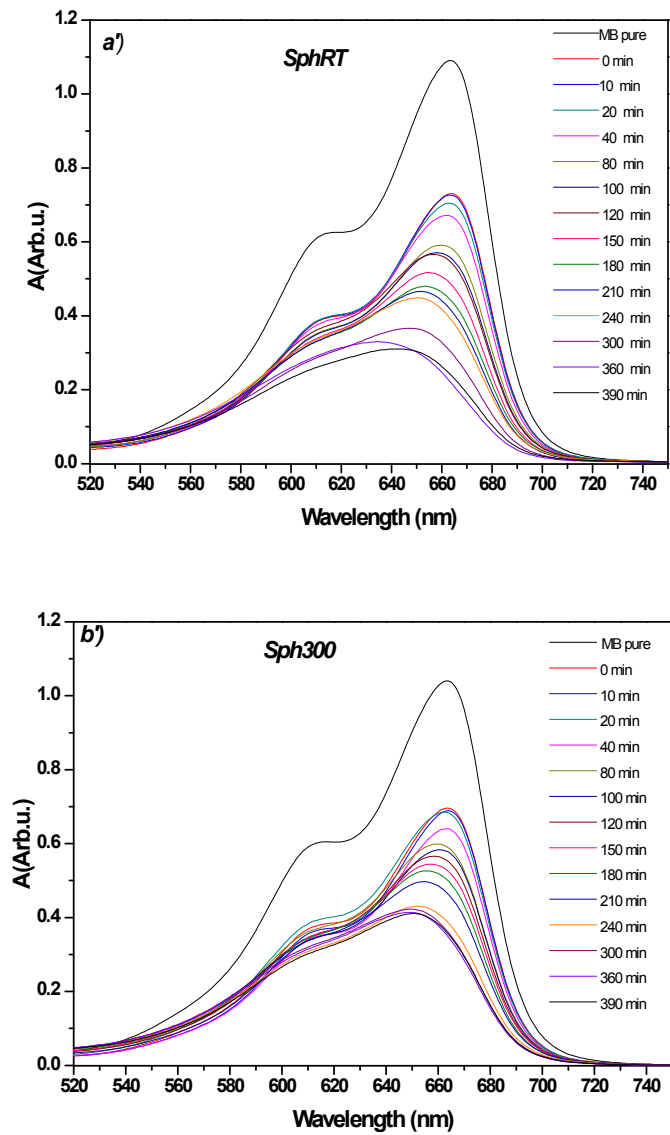

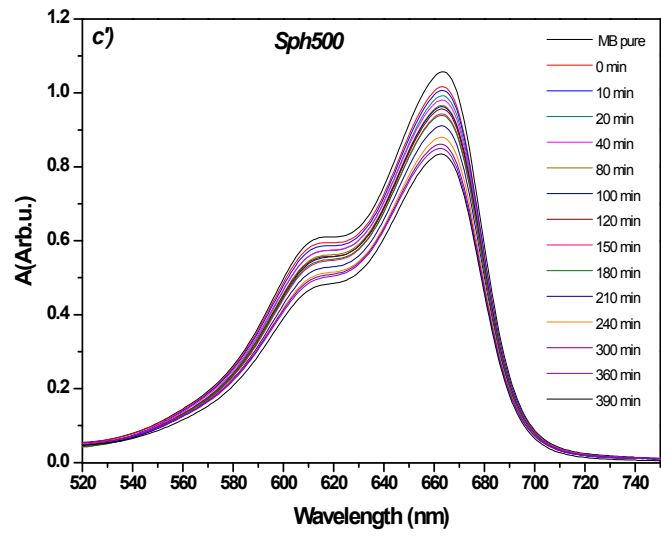

**Figure S5:** Absorption spectrum of photodegraded MB in the presence of SrWO<sub>4</sub> spheres: a') Sph\_RT; b') Sph\_300°C and c') Sph\_500 °C.

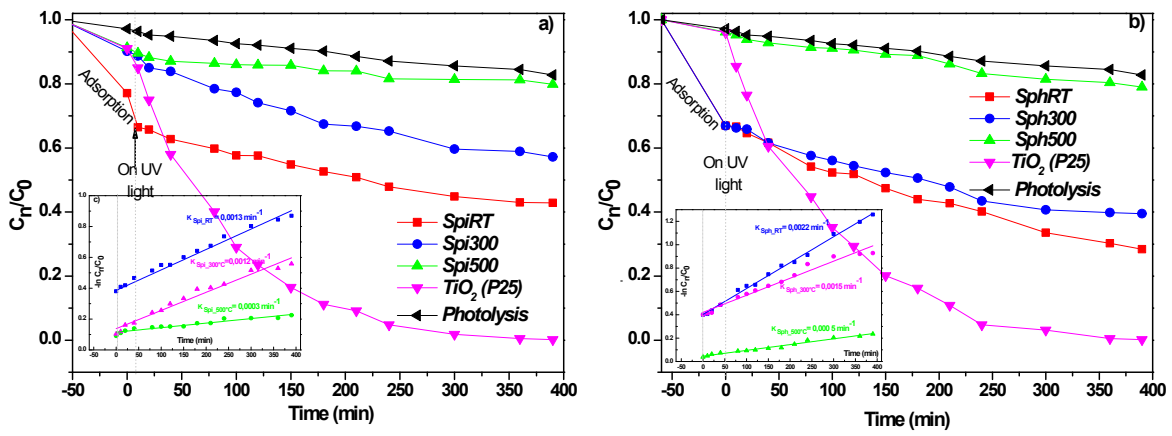

**Figure S6:** Photocatalytic efficiency of the various SrWO<sub>4</sub> samples of a) spindles and b) spheres co-precipitated at ambient temperature and calcined at 300°C and 500°C.

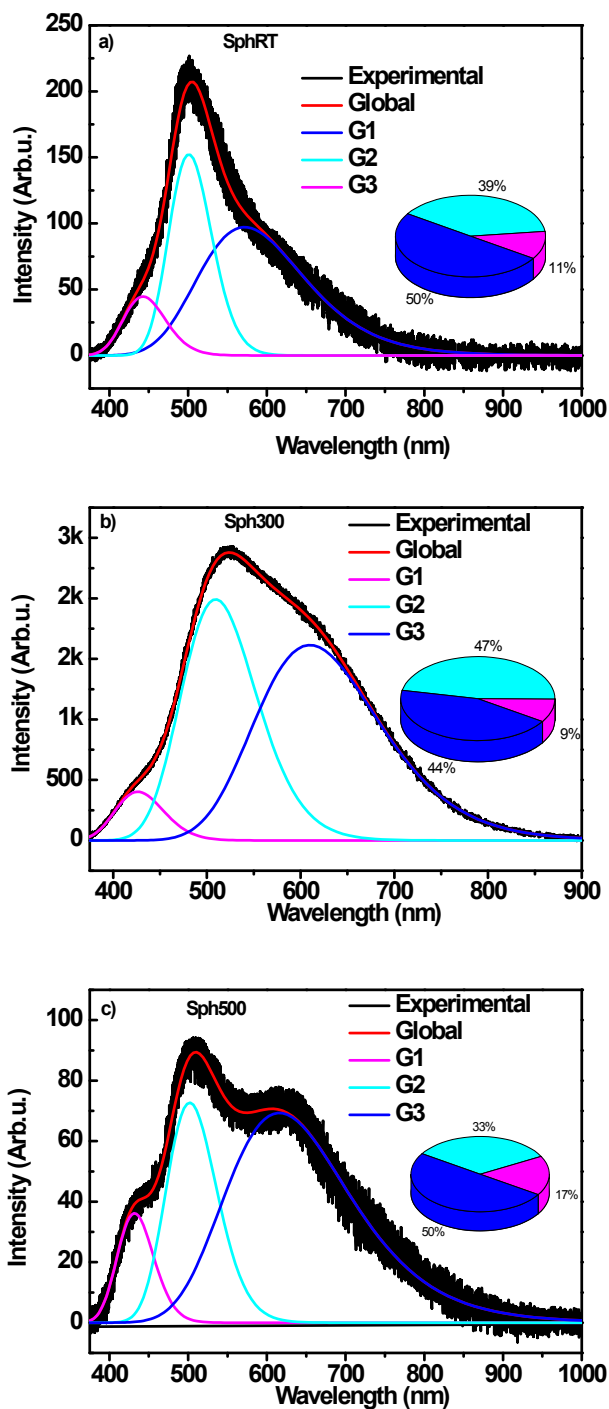

**Figure S7:** Luminescence analyses under UV light irradiation. Experimental emission bands of the SWO spheres: a') SphRT; b') Sph300°C and c') Sph500°C. The inset pie chart corresponds to the integrated intensity of each Gaussian component.

**Table S1.** The calculated CIE colour coordinates for both samples

| Morphology | Temperature | X     | Y     |
|------------|-------------|-------|-------|
| Spindles   | RT          | 0.296 | 0.415 |
|            | 300°C       | 0.350 | 0.425 |
|            | 500°C       | 0.357 | 0.253 |
| Spheres    | RT          | 0.337 | 0.386 |
|            | 300°C       | 0.445 | 0.432 |
|            | 500°C       | 0.348 | 0.421 |

**Table S2.** The integrated intensities and centroid energies of G1, G2, G3 components and global spectra as a function of composition x.

| SrWO <sub>4</sub> |             | Global Spectra |            | Bands     |            |           |        |           |            |
|-------------------|-------------|----------------|------------|-----------|------------|-----------|--------|-----------|------------|
| form              | Temperature | G              |            | G1        |            | G2        |        | G3        |            |
|                   |             | Intensity      | Wavelength | Intensity | Wavelength | Intensity | Energy | Intensity | Wavelength |
|                   |             | y              | th         | y         | th         | y         | y      | y         | th         |
| Spheres           | RT          | 131            | 502        | 61,6      | 443        | 51        | 502    | 19        | 570        |
|                   | 300°C       | 2020           | 523        | 885,9     | 402        | 951       | 510    | 177       | 608        |
|                   | 500°C       | 87             | 510        | 44,4      | 431        | 28,7      | 502    | 14        | 614        |
| Spindles          | RT          | 141            | 506        | 46        | 428        | 74        | 500    | 23        | 602        |
|                   | 300°C       | 17122          | 632        | 5458      | 419        | 10982     | 555    | 635       | 672        |
|                   | 500°C       | 2080           | 516        | 1020      | 437        | 717       | 506    | 342       | 596        |
